# Supplementary figures and images for: Evolutionary stability of collateral sensitivity to antibiotics in the model pathogen Pseudomonas aeruginosa
Source: eLife journal article supplement (doi:10.7554/elife.51481), 2019-10-28

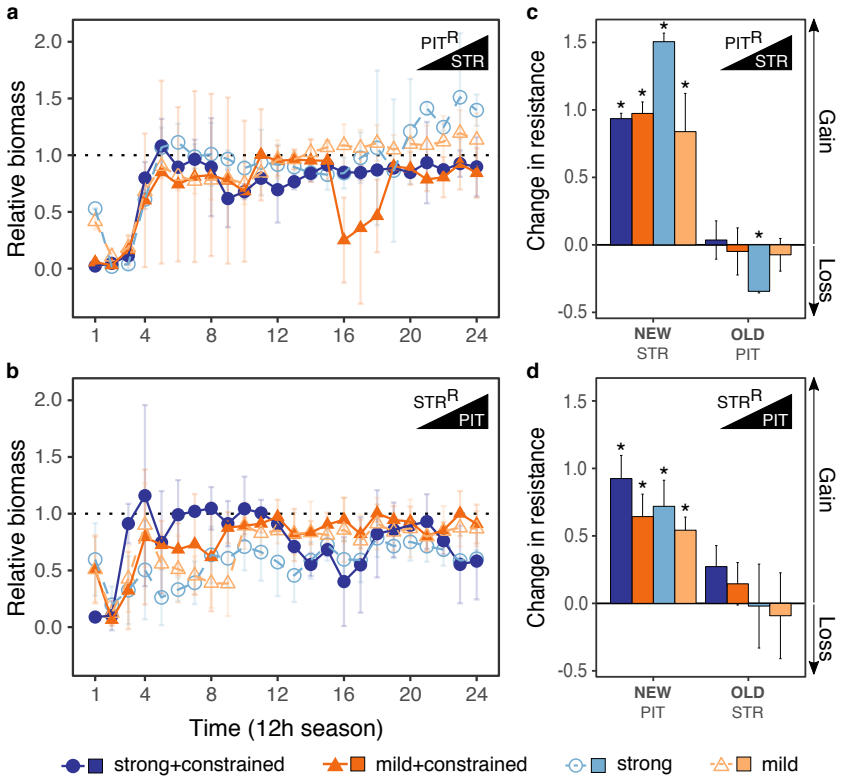

Supplement: supp [file elife_poa_e51481_Figure_3_figure_supplement_1.pdf › elife_poa_e51481_Figure_3_figure_supplement_1.pdf]

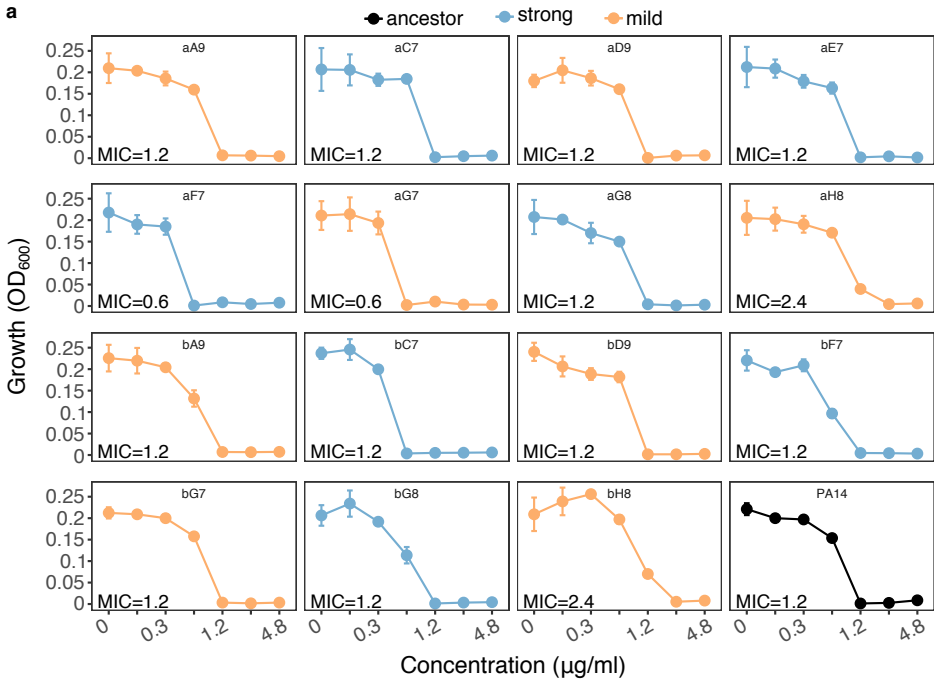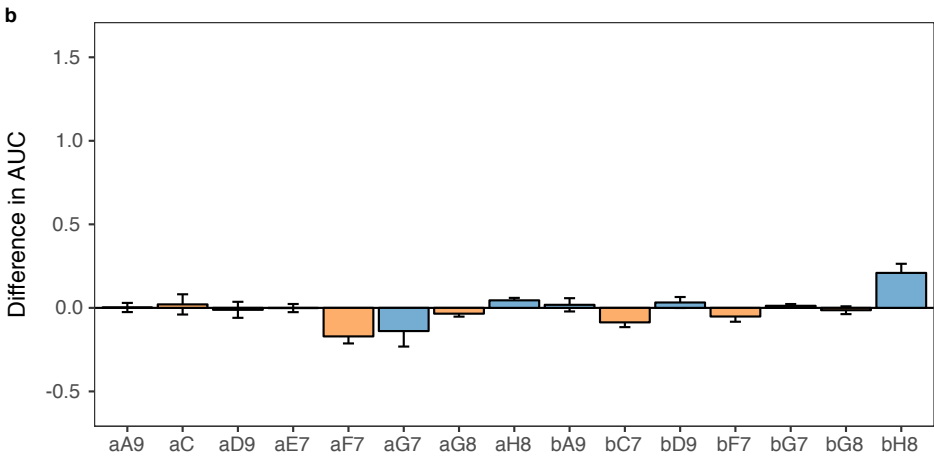

Supplement: supp [file elife_poa_e51481_Figure_3_figure_supplement_2.pdf › elife_poa_e51481_Figure_3_figure_supplement_2.pdf]

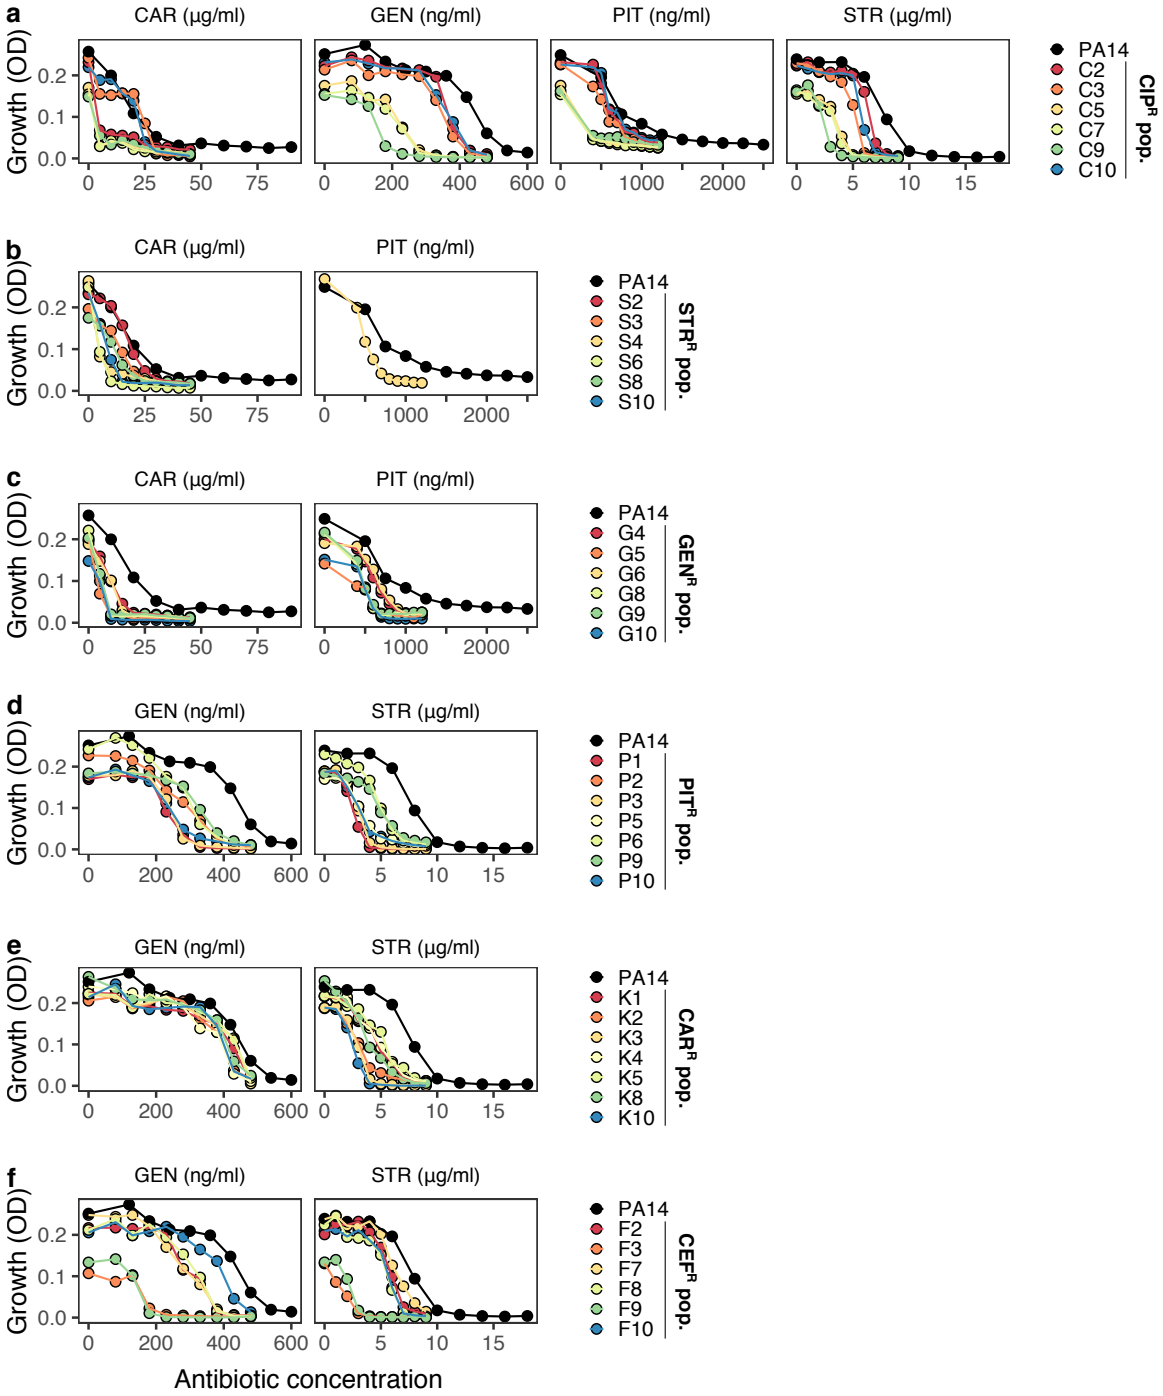

Supplement: supp [file elife_poa_e51481_Figure_5_figure_supplement_1.pdf › elife_poa_e51481_Figure_5_figure_supplement_1.pdf]
